# Supplementary material
Source: PubMed Central journal article supplement (PMC5414083)
Supplement: mp2015101x1.pdf [file mp2015101x1.pdf]

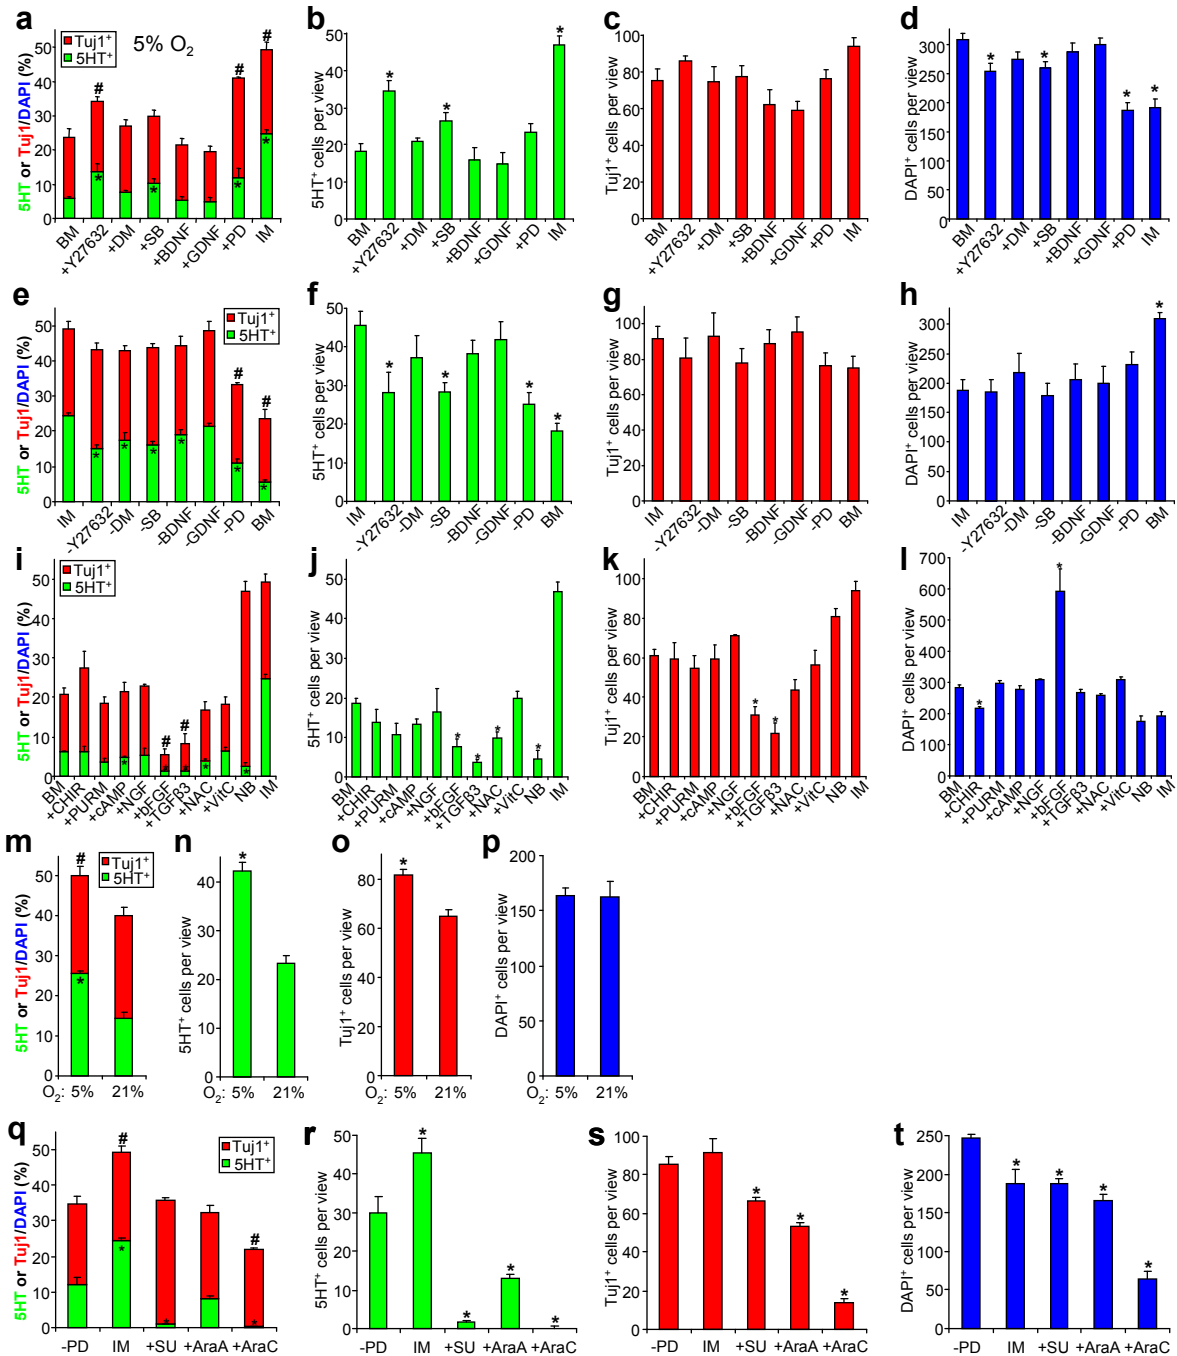

**Figure S1. Media additives and oxygen conditions.** MRC5 cells were converted to i5HT neurons in various media and oxygen conditions. **(a-d)** Basal Medium (BM) without or with (+) the indicated additive, or all of the additives (IM, Induction Medium). Y27632, Rock inhibitor (10  $\mu$ M), DM, dorsomorphin (0.5 mM), SB, SB431542 (5  $\mu$ M), PD, PD-0332991 (1  $\mu$ M). **(e-h)** Induction Medium minus the indicated additive, or minus all additive (i.e. BM, Basal Medium). **(i-l)** Basal Medium without or with the indicated additive that was found to be ineffective or detrimental. CHIR, CHIR99021; PURM, Purmorphamine; NAC, N-Acetyl-L-cysteine; VitC, ascorbic acid; NB, DMEM/F12 in Induction Medium (IM) was replaced with Neurobasal. **(m-p)** Reprogramming in Induction Medium with 5% or 21% O<sub>2</sub>. \*, #,  $p < 0.05$ , vs. 21% oxygen for 5HT<sup>+</sup> or Tuj1<sup>+</sup> cells respectively. **(q-t)** The effects of various mitotic inhibitors replacing PD (PD-0332991) in Induction Medium. +SU (SU9516 replacing PD in IM), +AraA (AraA replacing PD in IM), +AraC (AraA replacing PD in IM). \*, #,  $p < 0.05$  vs. IM without PD for 5HT<sup>+</sup> or Tuj1<sup>+</sup> respectively.

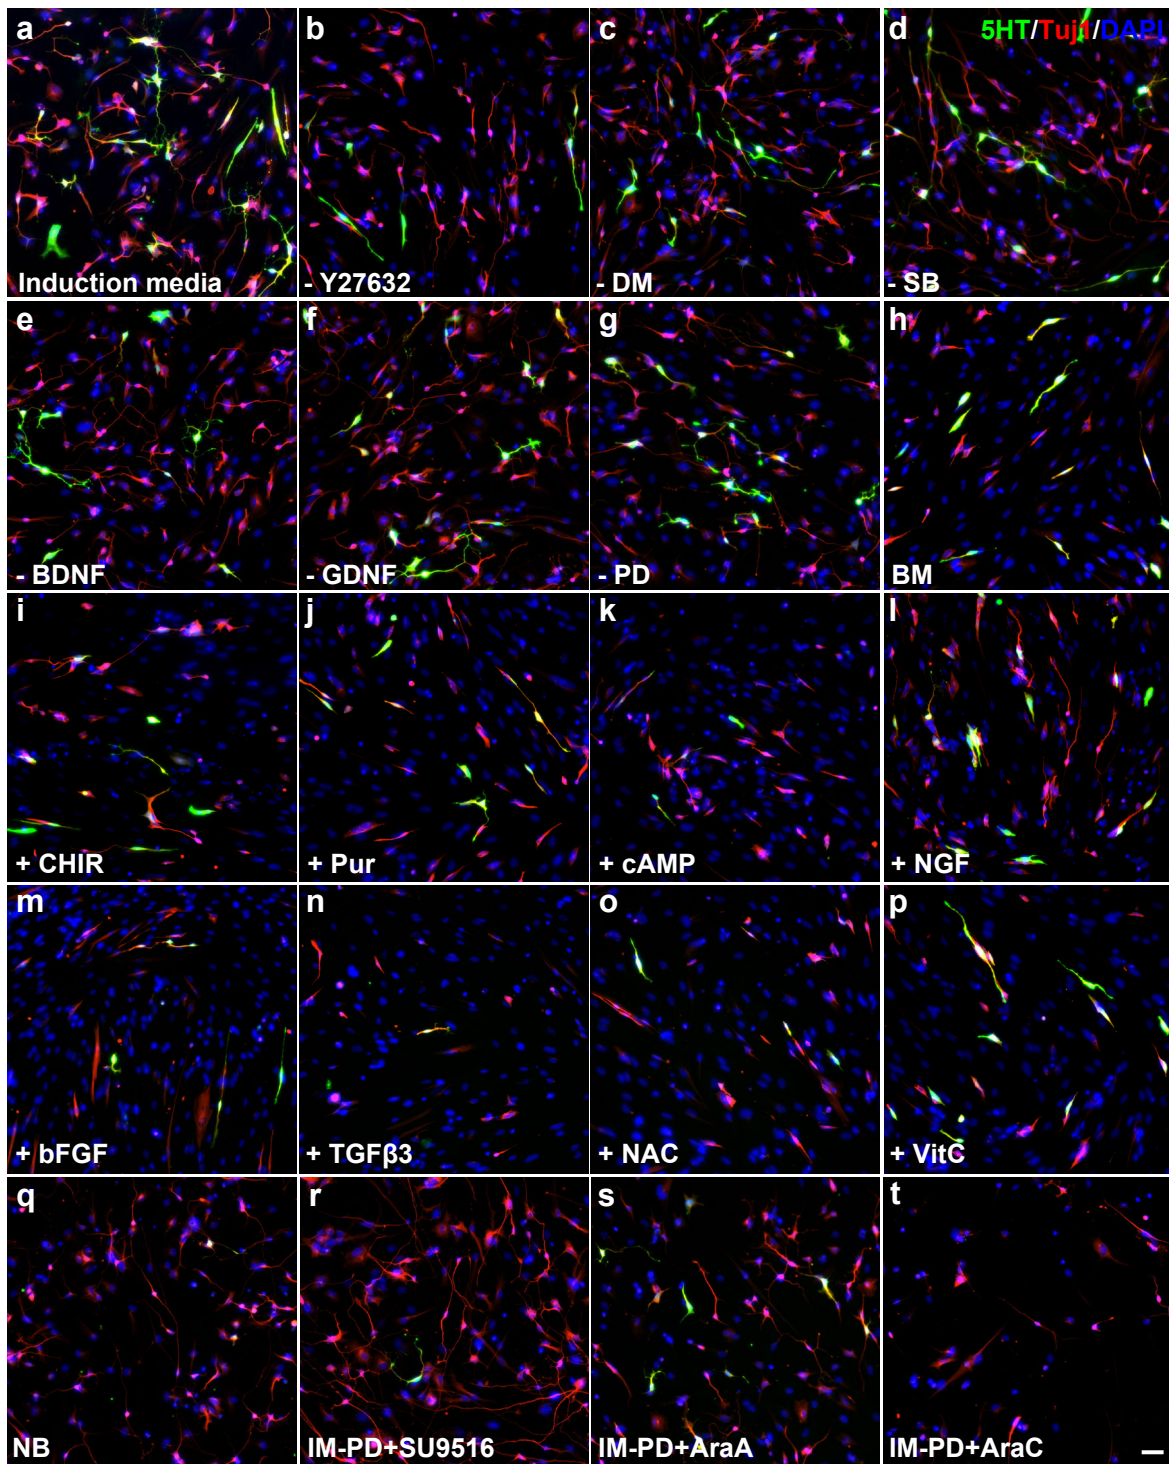

Figure S2. **Representative images of i5HT neurons generated with different media conditions.** MRC5 cells were converted to i5HT neurons in Induction Medium minus or plus the indicated additive. Quantification of the data was shown in Figure S1. bar, 50  $\mu$ m.

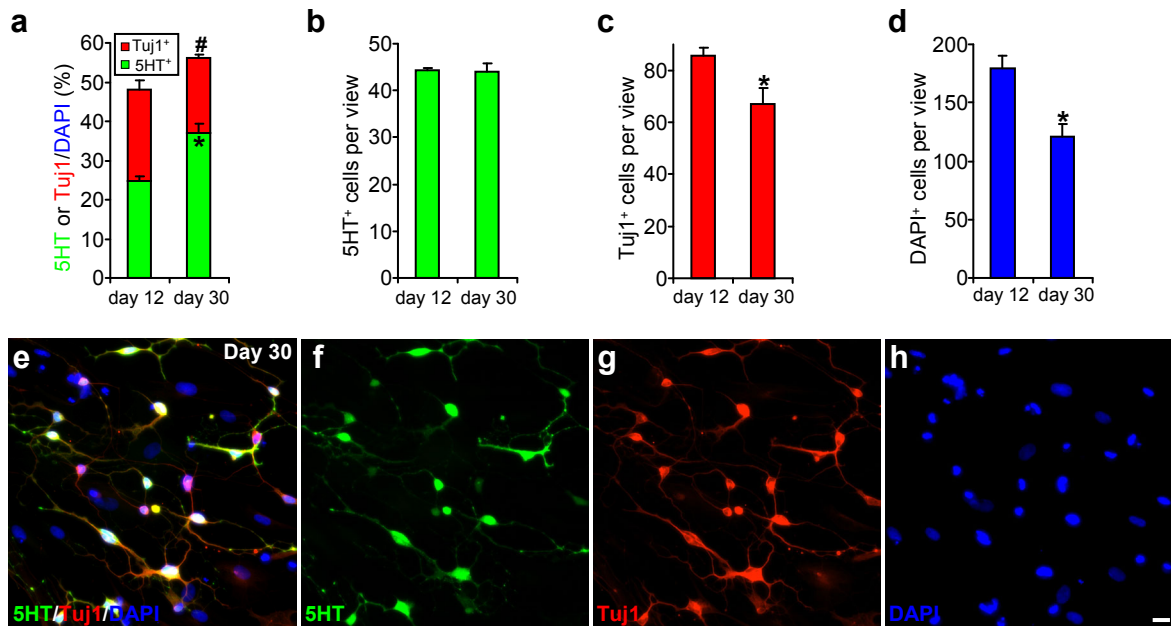

Figure S3. **Long-term survival of i5HT neurons.** Conversion efficiency (a) and yield (b-d) at 12 or 30 days after MRC5 cells were transduced with lentiviruses expressing AFLVp. \*, #  $p < 0.05$ , vs. 5HT<sup>+</sup> or Tuj1<sup>+</sup> at day 12, respectively,  $n = 3$  independent experiments. Scale bar, 20  $\mu$ m.

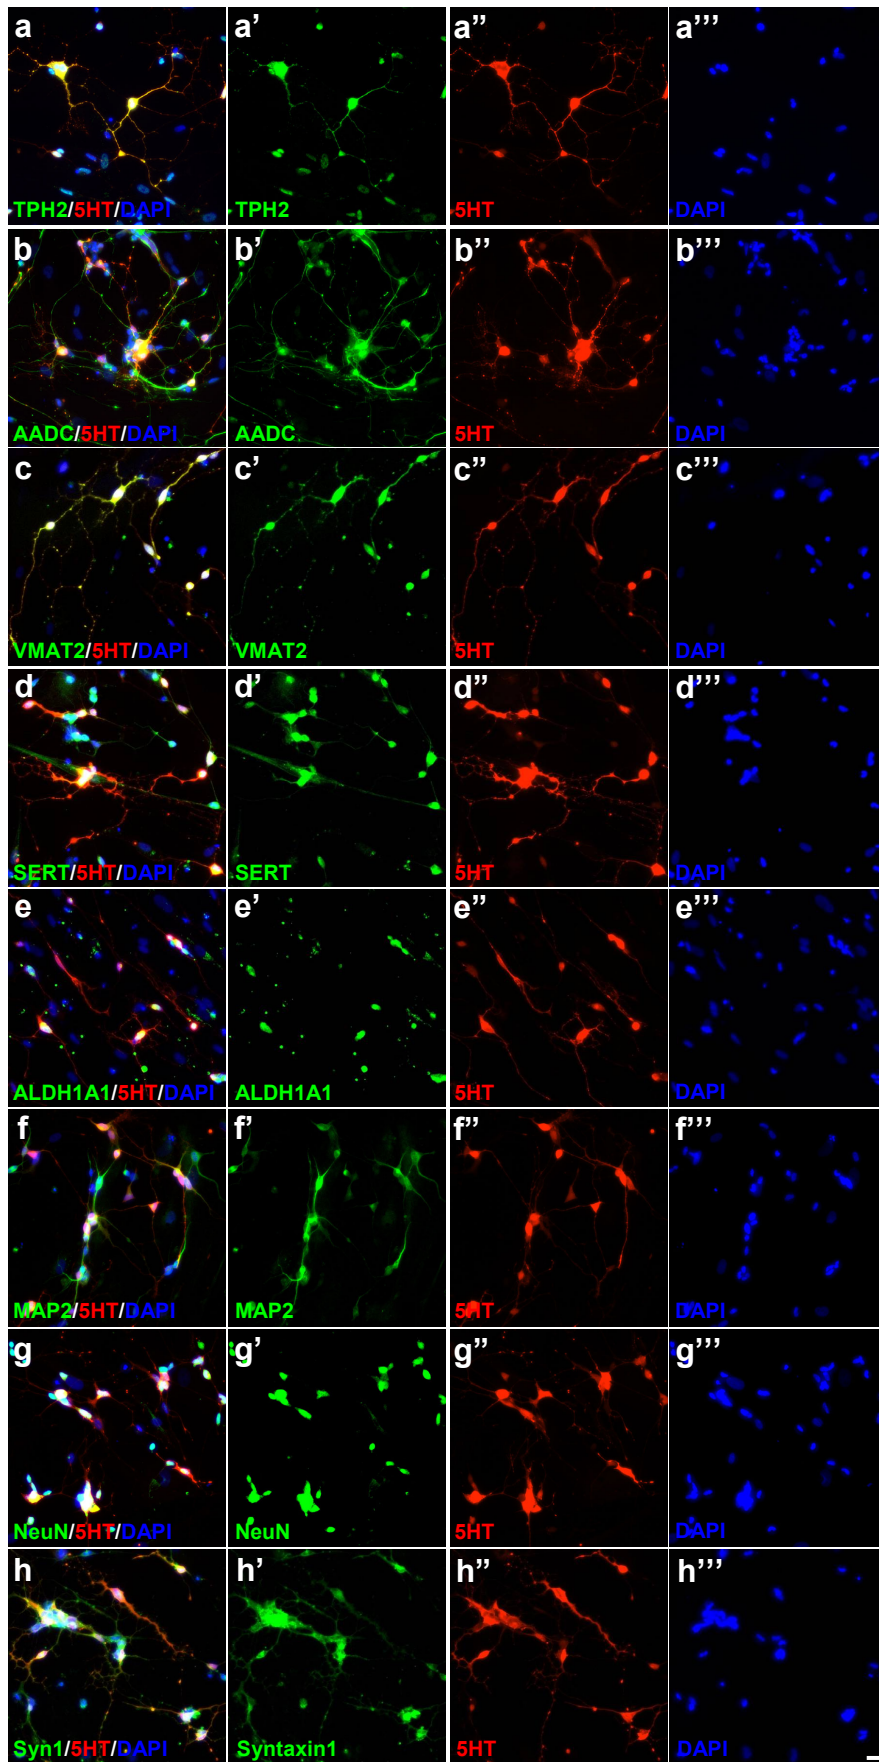

Figure S4. Separate channels of Fig. 4a-h. Scale bar, 20  $\mu$ m

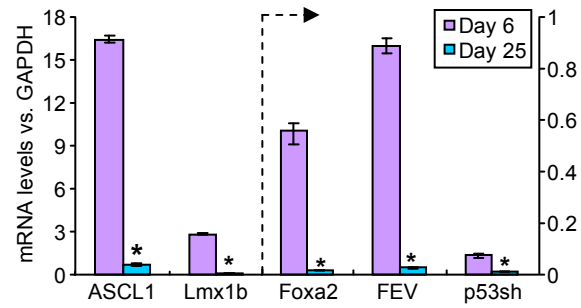

Figure S5. **Silencing of viral transgenes.** Expression levels of viral transgenes in MRC5 cells transduced with AFLVp at the indicated days. Arrow, values were according to the Y-axis on the right, n = 4 from 3 independent experiments.

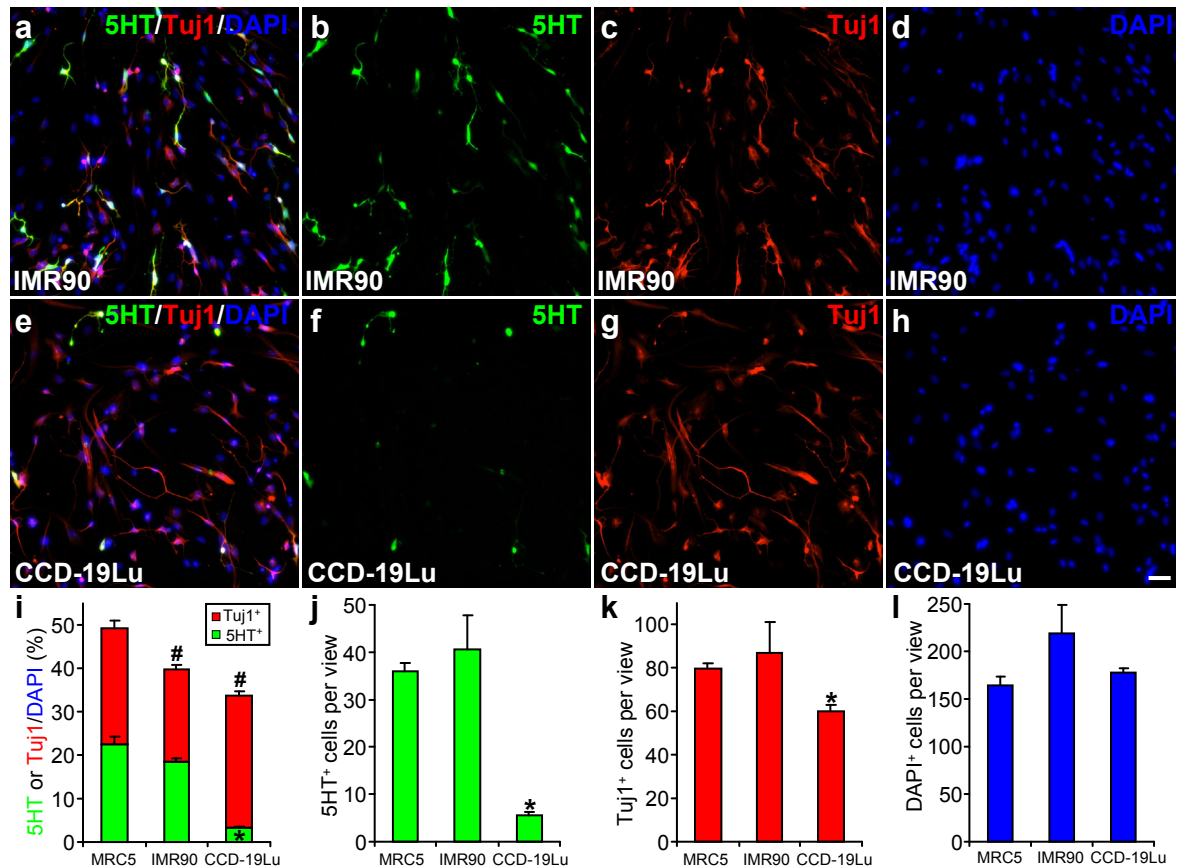

Figure S6. **Conversion of additional human fibroblast lines to i5HT neurons.** (a-h) Representative images of i5HT neurons derived from human fetal fibroblasts IMR90 cells (a-d) and human adult fibroblasts CCD-19Lu cells (e-h). Bar, 50  $\mu$ m. (i-l) Quantification of data on IMR90 and CCD-19Lu cells, in comparison to the data on the human fetal fibroblasts MRC5 cells. \*, #,  $p < 0.05$  vs. MRC5 for 5HT<sup>+</sup> or Tuj1<sup>+</sup> neurons, respectively,  $n = 3$  independent experiments.

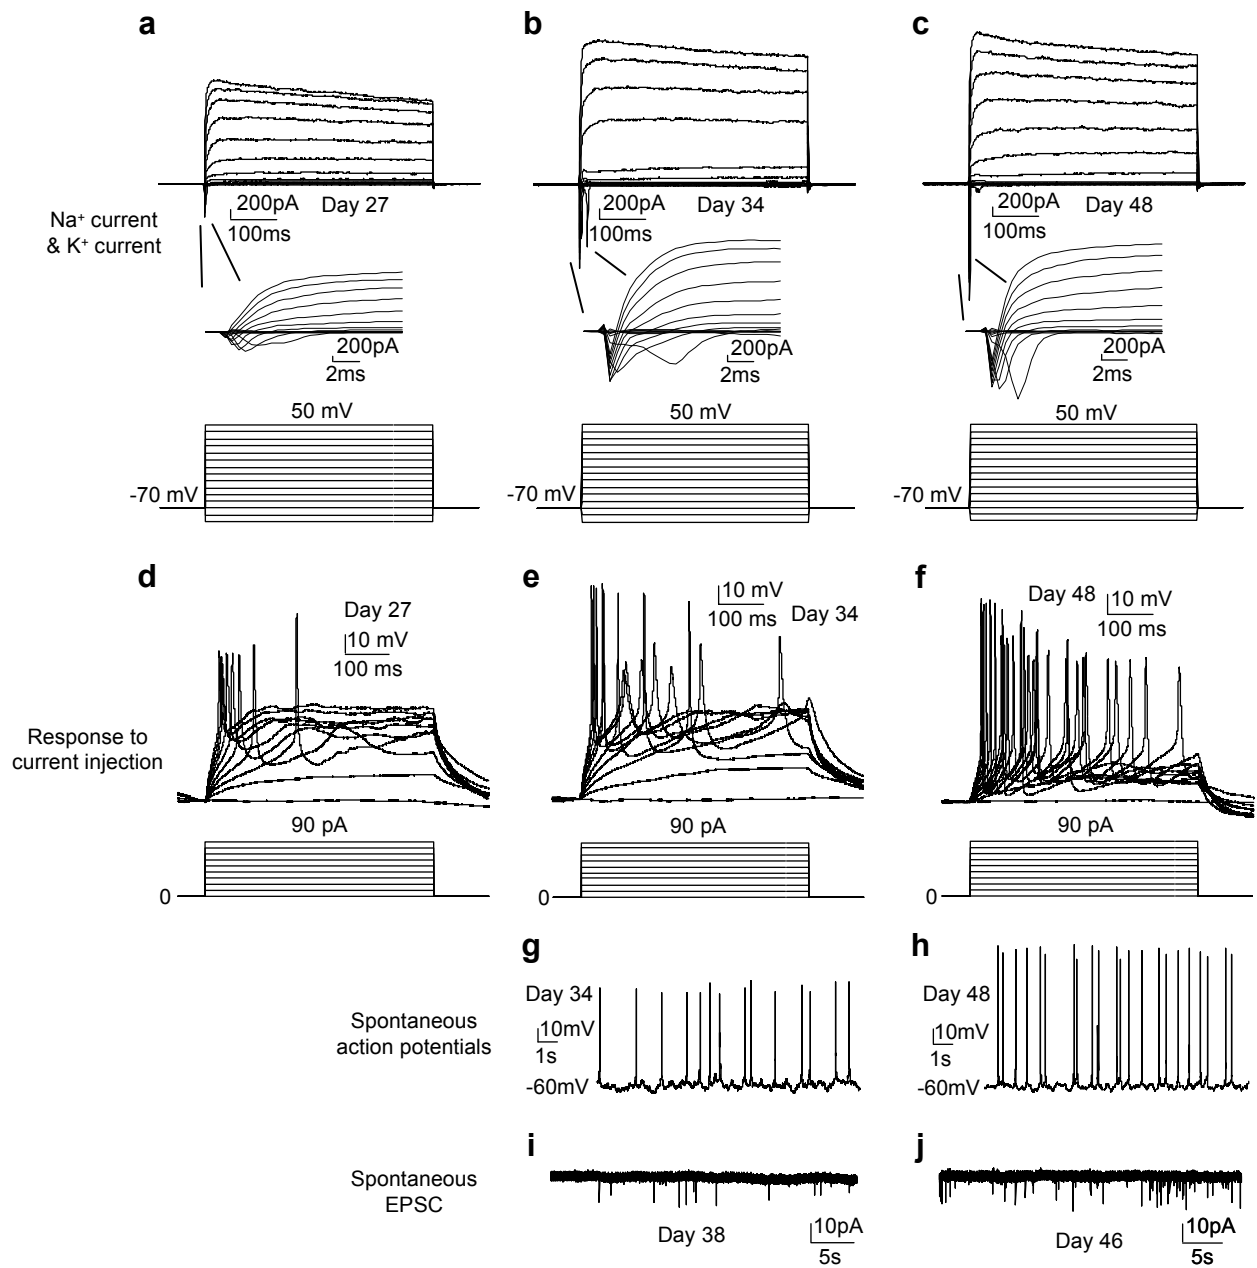

**Figure S7. Maturation of electrophysiological properties.** Electrophysiological recordings of i5HT neurons at the indicated days since Dox addition. Voltage dependent Na<sup>+</sup> currents and K<sup>+</sup> currents increased from small (a) to significant levels (b, c). Response to current injections changed from one (d) to multiple action potentials (e, f). Spontaneous action potentials were detected at day 34 (g) and increased in amplitude and frequency at day 48 (h). Spontaneous Excitatory Postsynaptic Currents (EPSCs) were observed at day 38 (i) and increased frequency at day 46 (j). Detailed quantifications of these electrophysiological parameters are in Supplementary Table 1.

**Supplementary Table 1: Maturation of Electrophysiological Properties**

|                                              | <b>Day 27</b>     | <b>Day 34</b>      | <b>Day 48</b>      |
|----------------------------------------------|-------------------|--------------------|--------------------|
| <b>Resting Membrane Potential (mV)</b>       | -20.2 ± 1.8 (n=3) | -33.3 ± 2.1 (n=10) | -42.6 ± 2.3 (n=13) |
| <b>Na<sup>+</sup> Currents (pA) at -20mV</b> | 534 ± 24 (n=3)    | 916 ± 34 (n=8)     | 1425 ± 86 (n=8)    |
| <b>K<sup>+</sup> Currents (pA) at 50mV</b>   | 1264 ± 112 (n=3)  | 1648 ± 123 (n=8)   | 2176 ± 124 (n=8)   |
| <b>Evoked Action Potentials</b>              | 2/4               | 8/8                | 8/8                |
| <b>Spontaneous Action Potentials</b>         | n.d.              | 3/8                | 3/8                |
| <b>Spontaneous AP Frequency (Hz)</b>         | n.d.              | 0.7 ± 0.1          | 1.1 ± 0.2          |
| <b>Spontaneous AP Amplitude (mV)</b>         | n.d.              | 61.7 ± 3.3         | 78.3 ± 6.0         |
| <b>Spontaneous EPSC</b>                      | n.d.              | 2/7 (Day 38)       | 2/6 (Day 46)       |
| <b>Spontaneous EPSC Frequency (Hz)</b>       | n.d.              | 0.3 ± 0.1          | 1.3 ± 0.2          |
| <b>Spontaneous EPSC Amplitude (pA)</b>       | n.d.              | 8.3 ± 1.2          | 7.6 ± 1.4          |



**Supplementary Table 2: Antibodies Used in the Study**

| Protein        | Species          | Company(Catalog Number)             | Dilution |
|----------------|------------------|-------------------------------------|----------|
| 5-HT           | Rabbit           | Sigma-Aldrich (S5545)               | 1:2000   |
| 5-HT           | Rat              | Millipore (MAB352)                  | 1:500    |
| TPH2           | Rabbit           | Novus Biological Inc. (NB100-74555) | 1:1000   |
| SERT           | Mouse            | MAb technologies (ST51-2)           | 1:1000   |
| TuJ1           | Mouse            | Civabce(MMS-435P-250)               | 1:1000   |
| MAP2           | Mouse            | Santa Cruz (sc-74421)               | 1:500    |
| NeuroN         | Mouse            | Millipore (MAB377)                  | 1:500    |
| AADC           | Rabbit           | Millipore (AB1569)                  | 1:1000   |
| ALDH1A1        | Rabbit           | Abcam (ab23375)                     | 1:2000   |
| VMAT2          | Rabbit           | Millipore (AB1598p)                 | 1:500    |
| Syntaxin-1     | Mouse            | Life Technologies (P21943)          | 1:1000   |
| AlexaFluor 488 | Anti-Rabbit IgG  | Life Technologies (A11008)          | 1:2000   |
| AlexaFluor 594 | Anti-Rabbit IgG  | Life Technologies (A11012)          | 1:2000   |
| AlexaFluor 488 | Anti-mouse IgG   | Life Technologies (A21202)          | 1:2000   |
| AlexaFluor 594 | Anti-mouse IgG2a | Life Technologies (A21135)          | 1:2000   |
| AlexaFluor594  | Anti-Rat IgG     | Life Technologies (A11007)          | 1:2000   |

**Supplementary Table 3: Sequence of PCR Primers**

| Gene                           | Accession    | Primer Sequences                                                                 |
|--------------------------------|--------------|----------------------------------------------------------------------------------|
| <b>hASCL1</b><br>transgenic    | NM_004316    | Forward: TACTCGTCGGACGAGGGCTCTTA<br>Reverse: AAAGCAGCGTATCCACATAGCGTA            |
| <b>hFOXA2</b><br>transgenic    | NM_021784.4  | Forward: GTCACGAACAAAACGGGCCT<br>Reverse: AAAGCAGCGTATCCACATAGCGTA               |
| <b>hLMX1b</b><br>transgenic    | NM_002316.3  | Forward: CTCTACTCCATGCAGAGTTCTT<br>Reverse: AAAGCAGCGTATCCACATAGCGTA             |
| <b>hFEV</b><br>transgenic      | NM_017521.2  | Forward: TCTACCCAGTCCCAGCTTGCA<br>Reverse: AAAGCAGCGTATCCACATAGCGTA              |
| <b>hp53shRNA</b><br>transgenic | NM_000546    | Forward: TACAGGGACAGCAGAGATCCACTT<br>Reverse: AACCGCAAGGAACCTTCCCGACTT           |
| <b>hASCL1</b><br>endogenous    | NM_004316    | Forward: TACTCGTCGGACGAGGGCTCTTA<br>Reverse: GACTAAAGATGCAGGTTGTGCGA             |
| <b>hFOXA2</b><br>endogenous    | NM_021784.4  | Forward: CTACGAACAGGTGATGCACTAC<br>Reverse: TTGCTCTCTCACTTGTCTCTCGA              |
| <b>hLMX1b</b><br>endogenous    | NM_002316.3  | Forward: GGCCTCACGCCGCCCAAAT<br>Reverse: TGGCTGGCTCTCAGGAGGCGAA                  |
| <b>hFEV</b><br>endogenous      | NM_017521.2  | Forward: TCTACCCAGTCCCAGCTTGCA<br>Reverse: CTCTGGATTAGAGGACGGTTGAC               |
| <b>hMAP2</b><br>endogenous     | NM_031845    | Forward: CAGGTGGCGGACGTGTGAAAATTGAGAGTG<br>Reverse: CACGCTGGATCTGCCTGGGGACTGTG   |
| <b>hTUBB3</b><br>endogenous    | NM_001197181 | Forward: TTTGGACATCTTTCAGGCCTGACA<br>Reverse: AGCGAGTGGGTCAGCTGGAAGC             |
| <b>hSYN1</b><br>endogenous     | NM_006950    | Forward: TGAAGCCGATTTTTGTGCTGA<br>Reverse: GACCAAAGTGCAGGTTAGTCTCC               |
| <b>hPCLO</b><br>endogenous     | NM_033026    | Forward: CAGACACTTTCAGGTCAGAGC<br>Reverse: AGGCATCATACTAGACTTGTGCT               |
| <b>hALDH1A1</b><br>endogenous  | NM_000689.4  | Forward: GAATTTCCCGTTGGTTATGCT<br>Reverse: TGTAGGCCCATAACCAGGAA                  |
| <b>hAADC</b><br>endogenous     | NM_001082971 | Forward: AGAACAGACTTAACGGGAGCCT<br>Reverse: CTGGACATGCTTGCGGATATAA               |
| <b>hVMAT2</b><br>endogenous    | NM_003054    | Forward: CTTTGGAGTTGGTTTTGC<br>Reverse: GCAGTTGTGATCCATGAG                       |
| <b>hGAPDH</b><br>endogenous    | NM_002046.3  | Forward: GACAACAGCCTCAAGATCATCAG<br>Reverse: ATGGCATGGACTGTGGTCATGAG             |
| <b>hCACNA1C</b><br>endogenous  | NM_001167625 | Forward: TCCGCTGCTTCTGAAGATGA<br>Reverse: GGCCGTCGCTTTGGTAGTA                    |
| <b>hSCN1A</b><br>endogenous    | NM_001165963 | Forward: TGGGGAGTGGATAGAGACCA<br>Reverse: GAAAGAGATTCAGGACCACTAGG                |
| <b>hTPH1</b><br>endogenous     | NM_004179.2  | Forward: CCCTTTGATCCCAAGATTAC<br>Reverse: CATTATGGCACTGGTTATG                    |
| <b>hTPH2</b><br>endogenous     | NM_173353.3  | Forward: GGTTCCCTCGGAAGATCTCTGAGTTAGACA<br>Reverse: AGAGCTCCCGGAATACAACACCCCAAGT |
| <b>hSERT</b><br>endogenous     | NM_001045.4  | Forward: CAGCGTGTGAAGATGGAGAAG<br>Reverse: TGGGATAGAGTGCCGTGTGT                  |
